# Supplementary material
Source: PubMed Central journal article supplement (PMC4546517)
Supplement: NIHMS671238-supplement-253_2015_6496_MOESM1_ESM.pdf [file NIHMS671238-supplement-253_2015_6496_MOESM1_ESM.pdf]

**Supporting information for:**

**Optimization of recombinant expression enables discovery of novel cytochrome P450**

**activity in rice diterpenoid biosynthesis**

***Applied Microbiology and Biotechnology***

Naoki Kitaoka<sup>1,2</sup>, Yisheng Wu<sup>1,3</sup>, Meimei Xu and Reuben J. Peters<sup>4</sup>

Department of Biochemistry, Biophysics, and Molecular Biology, Iowa State University, Ames, IA 50011, U.S.A.

<sup>1</sup>These authors contributed equally to this work

<sup>2</sup>Current address: Tohoku University, Sendai 980-8577, JAPAN

<sup>3</sup>Current address: Conagen Inc., Bedford, MA 01730, U.S.A.

<sup>4</sup>To whom correspondence should be addressed – Email: rjpeters@iastate.edu

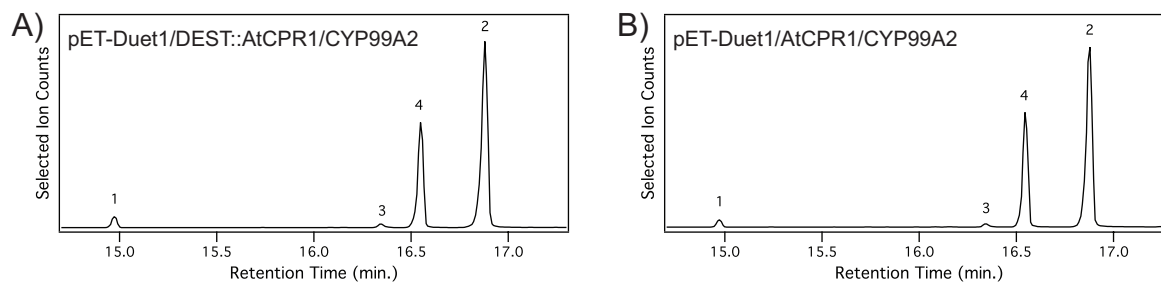

**Supplemental Figure S1.** Comparison of CYP99A2 expression vectors in our metabolic engineering system. Either (A) pET-Duet1/DEST::AtCPR1/CYP99A2 or (B) pET-Duet/AtCPR1/CYP99A2 were co-expressed along with pGGsC and pCDF-Duet1/DEST::OsKLS4/AtCPR1, to produce the *syn*-pimaradiene precursor (**1**) that was further sequentially transformed by CYP99A2 to *syn*-pimaradien-19-ol (**2**), *syn*-pimaradien-19-al (**3**), and then *syn*-pimaradien-19-oic acid (observed here as the methyl ester, **4**).

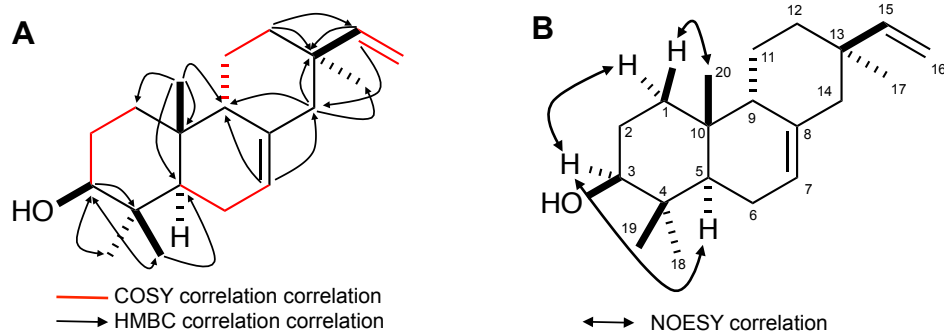

**Supplemental Figure S2.** Key COSY, HMBC and NOESY correlations observed for *syn*-pimaradien-3 $\beta$ -ol.

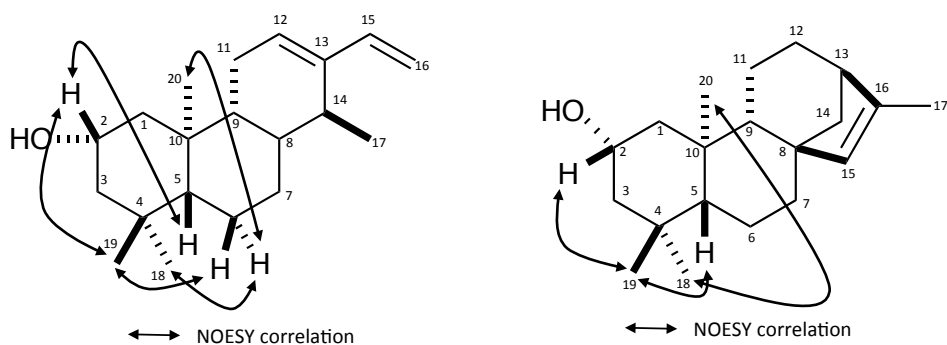

**Supplemental Figure S3.** Key NOESY correlations observed for 2 $\alpha$ -hydroxy-*ent*-cassadiene and 2 $\alpha$ -hydroxy-*ent*-isokaurene.

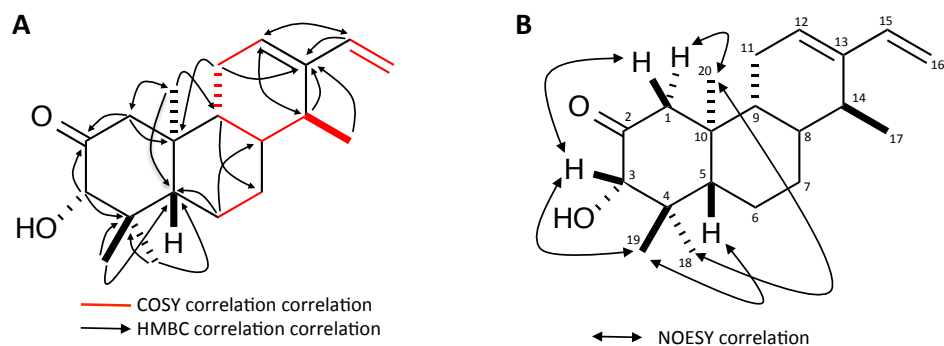

**Supplemental Figure S4.** Key COSY, HMBC and NOESY correlations observed for 3 $\alpha$ -hydroxy-*ent*-cassadien-2-one.

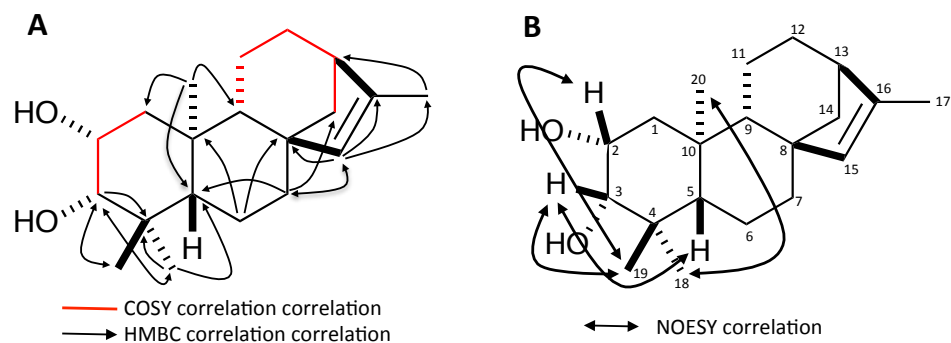

**Supplemental Figure S5.** Key COSY, HMBC and NOESY correlations observed for 2 $\alpha$ ,3 $\alpha$ -dihydroxy-*ent*-isokaurene.

**Supplemental Table S1.** <sup>1</sup>H-NMR and <sup>13</sup>C-NMR assignments for *syn*-pimaradien-3β-ol.

| position | δ <sub>C</sub> (ppm) | δ <sub>H</sub> (ppm) | multiplicity                         |
|----------|----------------------|----------------------|--------------------------------------|
| 1        | 34.8                 | α 1.50               | m                                    |
|          |                      | β 1.16               | m                                    |
| 2        | 28.0                 | 1.58                 | m                                    |
|          |                      | 1.55                 | m                                    |
| 3        | 80.2                 | 3.12                 | dd ( <i>J</i> = 7.6, 7.6 Hz)         |
| 4        | 39.4                 | -                    |                                      |
| 5        | 43.8                 | 1.13                 | m                                    |
| 6        | 24.0                 | 1.93                 | m                                    |
|          |                      | 1.88                 | m                                    |
| 7        | 120.1                | 5.24                 | d ( <i>J</i> = 5.3 Hz)               |
| 8        | 137.3                | -                    |                                      |
| 9        | 53.6                 | 1.28                 | m                                    |
| 10       | 35.6                 | -                    |                                      |
| 11       | 25.7                 | 1.61                 | m                                    |
|          |                      | 1.14                 | m                                    |
| 12       | 38.3                 | 1.42                 | m                                    |
|          |                      | 1.36                 | ddd ( <i>J</i> = 13.2, 13.2, 4.2 Hz) |
| 13       | 39.2                 | -                    |                                      |
| 14       | 48.4                 | 1.92                 | m                                    |
|          |                      | 1.75                 | dd ( <i>J</i> = 12.1, 2.3 Hz)        |
| 15       | 150.9                | 5.74                 | dd ( <i>J</i> = 17.5, 10.8 Hz)       |
| 16       | 109.8                | 4.84                 | d ( <i>J</i> = 17.5 Hz)              |
|          |                      | 4.78                 | d ( <i>J</i> = 10.8 Hz)              |
| 17       | 22.4                 | 0.802                | s                                    |
| 18       | 16.2                 | 0.799                | s                                    |
| 19       | 28.9                 | 0.93                 | s                                    |
| 20       | 22.8                 | 0.85                 | s                                    |

**Supplemental Table S2.**  $^1\text{H}$ -NMR and  $^{13}\text{C}$ -NMR assignments for 2 $\alpha$ -hydroxy-*ent*-cassadiene.

| position | $\delta_{\text{C}}$ (ppm) | $\delta_{\text{H}}$ (ppm) | multiplicity              |
|----------|---------------------------|---------------------------|---------------------------|
| 1        | 45.6                      | $\alpha$ 1.38             | m                         |
|          |                           | $\beta$ 1.76              | brd ( $J = 12.0$ hz)      |
| 2        | 68.3                      | 4.15                      | brs                       |
| 3        | 47.1                      | $\alpha$ 1.66             | m                         |
|          |                           | $\beta$ 1.45              | m                         |
| 4        | 32.9                      | -                         |                           |
| 5        | 54.3                      | 0.97                      | m                         |
| 6        | 21.8                      | $\alpha$ 1.41             | m                         |
|          |                           | $\beta$ 1.66              | m                         |
| 7        | 31.1                      | $\alpha$ 1.66             | m                         |
|          |                           | $\beta$ 1.38              | m                         |
| 8        | 35.0                      | 1.61                      | m                         |
| 9        | 45.0                      | 1.30                      | m                         |
| 10       | 36.8                      | -                         |                           |
| 11       | 25.4                      | $\alpha$ 2.00             | m                         |
|          |                           | $\beta$ 2.10              | m                         |
| 12       | 128.7                     | 5.60                      | brs                       |
| 13       | 141.9                     | -                         |                           |
| 14       | 32.2                      | 2.39                      | m                         |
| 15       | 138.9                     | 6.20                      | dd ( $J = 17.6, 11.6$ hz) |
| 16       | 109.7                     | 5.06                      | d ( $J = 17.6$ hz)        |
|          |                           | 4.88                      | d ( $J = 11.6$ hz)        |
| 17       | 14.8                      | 0.93                      | s                         |
| 18       | 24.8                      | 1.06                      | s                         |
| 19       | 34.1                      | 0.92                      | s                         |
| 20       | 16.5                      | 1.09                      | s                         |

**Supplemental Table S3.**  $^1\text{H}$ -NMR and  $^{13}\text{C}$ -NMR assignments for 3 $\alpha$ -hydroxy-*ent*-cassadien-2-one.

| position | $\delta_{\text{C}}$ (ppm) | $\delta_{\text{H}}$ (ppm) | multiplicity              |
|----------|---------------------------|---------------------------|---------------------------|
| 1        | 52.0                      | $\alpha$ 2.42             | d ( $J = 12.9$ Hz)        |
|          |                           | $\beta$ 2.21              | d ( $J = 12.9$ Hz)        |
| 2        | 211.5                     | -                         |                           |
| 3        | 83.3                      | 3.92                      | s                         |
| 4        | 46.3                      | -                         |                           |
| 5        | 54.4                      | 1.54                      | m                         |
| 6        | 31.0                      | 1.72                      | m                         |
|          |                           | 1.46                      | m                         |
| 7        | 21.9                      | $\alpha$ 1.46             | m                         |
|          |                           | $\beta$ 1.77              | m                         |
| 8        | 35.1                      | 1.55                      | m                         |
| 9        | 45.2                      | 1.61                      | m                         |
| 10       | 44.4                      | -                         |                           |
| 11       | 25.6                      | $\alpha$ 1.96             | m                         |
|          |                           | $\beta$ 2.05              | m                         |
| 12       | 127.8                     | 5.57                      | m                         |
| 13       | 142.5                     | -                         |                           |
| 14       | 32.3                      | 2.43                      | m                         |
| 15       | 138.9                     | 6.20                      | dd ( $J = 17.6, 10.8$ Hz) |
| 16       | 110.6                     | 5.057                     | d ( $J = 17.6$ Hz)        |
|          |                           | 4.882                     | d ( $J = 10.8$ Hz)        |
| 17       | 15.1                      | 0.929                     | d ( $J = 7.0$ Hz)         |
| 18       | 29.8                      | 1.062                     | s                         |
| 19       | 17.3                      | 0.917                     | s                         |
| 20       | 14.8                      | 1.091                     | s                         |

**Supplemental Table S4.**  $^1\text{H}$ -NMR and  $^{13}\text{C}$ -NMR assignments for  $2\alpha,3\alpha$ -dihydroxy-*ent*-isokaurene.

| position | $\delta_{\text{C}}$ (ppm) | $\delta_{\text{H}}$ (ppm) | multiplicity             |
|----------|---------------------------|---------------------------|--------------------------|
| 1        | 44.5                      | 2.26                      | dd ( $J = 14.9, 2.8$ Hz) |
|          |                           | 1.03                      | m                        |
| 2        | 71.2                      | 4.08                      | m                        |
| 3        | 78.5                      | 3.18                      | dd ( $J = 7.0, 4.1$ Hz)  |
| 4        | 38.2                      | -                         |                          |
| 5        | 54.8                      | 0.80                      | m                        |
| 6        | 18.9                      | 1.31                      | m                        |
|          |                           | 1.30                      | m                        |
| 7        | 39.3                      | 1.53                      | m                        |
|          |                           | 1.56                      | m                        |
| 8        | 49.0                      | -                         |                          |
| 9        | 49.2                      | 0.87                      | m                        |
| 10       | 38.9                      | -                         |                          |
| 11       | 18.9                      | 1.55                      | m                        |
|          |                           | 1.31                      | m                        |
| 12       | 25.0                      | 1.48                      | m                        |
|          |                           | 1.48                      |                          |
| 13       | 44.8                      | 2.29                      | m                        |
| 14       | 43.6                      | 2.05                      | m                        |
|          |                           | 1.30                      |                          |
| 15       | 135.4                     | 5.02                      |                          |
| 16       | 142.9                     | -                         |                          |
| 17       | 15.3                      | 1.68                      | s                        |
| 18       | 29.7                      | 0.974                     | s                        |
| 19       | 29.7                      | 0.966                     | s                        |
| 20       | 18.9                      | 1.32                      | s                        |
